# Supplementary material
Source: ML conference proceedings conference paper supplement (https://openreview.net/forum?id=0ze7XgWcYNV)
Supplement: supplementary_material [file attachment]

## A TRAINING PROCEDURE

**Training Algorithms.** We pre-train the operation policy  $\hat{\pi}$  with imitation learning (Ross et al., 2011), minimizing the cross entropy between its action distributions with those of a shortest-path oracle. We use advantage actor-critic (Mnih et al., 2016) to train the interaction policy  $\psi_\theta$ . This method simultaneously estimates an actor policy  $\psi_\theta : \bar{\mathcal{B}} \rightarrow \Delta(\bar{\mathcal{A}})$  and a critic function  $V_\phi : \bar{\mathcal{B}} \rightarrow \mathbb{R}$ . Given an execution  $\bar{\tau} = (\bar{s}_1, \bar{a}_1, \bar{c}_1 \dots, \bar{s}_H)$ , the gradients with respect to the actor and critic are computed as follows

$$\nabla_\theta \mathcal{L}_{\text{actor}} = \sum_{t=1}^H (V_\phi(\bar{b}_t^v) - C_t) \nabla_\theta \log \psi_\theta(\bar{a}_t | \bar{b}_t^a) \quad (7)$$

$$\nabla_\phi \mathcal{L}_{\text{critic}} = \sum_{t=1}^H (V_\phi(\bar{b}_t^v) - C_t) \nabla_\phi V_\phi(\bar{b}_t^v) \quad (8)$$

where  $C_t = \sum_{j=t}^H c_j$ ,  $\bar{b}_t^a$  is a belief state summarizes the partial execution  $\tau_{1:t}$  for the actor, and  $\bar{b}_t^v$  is a belief state for the critic.

**Cost function.** The cost function introduced in §4.4 is not effective for learning the interaction policy because the task error is given only at the end of an episode. We extend the reward-shaping method proposed by Ng et al. (1999) to goal-conditioned policies, augmenting the original cost function with a shaping function  $\Phi(s, g)$  that measures the shortest-path distance from a location  $s$  to a goal  $g$ . The cost received by the agent at time step  $t$  is  $\tilde{c}_t \triangleq \bar{c}_t + \Phi(s_{t+1}, g_{t+1}) - \Phi(s_t, g_t)$ . We assume the agent transitions to and remains in a special terminal state  $s_{\text{term}} \in \mathcal{S}$  after it terminates execution of the main goal. We set  $\Phi(s_{\text{term}}, \text{None}) = 0$ , where  $g_t = \text{None}$  signals that the episode has ended. Hence, the cumulative cost of an execution under this new cost function is

$$\sum_{t=1}^H \tilde{c}_t = \sum_{t=1}^H \bar{c}_t + \Phi(s_{t+1}, g_{t+1}) - \Phi(s_t, g_t) = \sum_{t=1}^H \bar{c}_t - \Phi(s_1, g_1) \quad (9)$$

Since  $\Phi(s_1, g_1)$  does not depend on the action taken in  $s_1$ , minimizing the new cumulative cost does not change the optimal policy for the task  $(s_1, g_1)$ .

**Model Architecture.** We adapt the V&L BERT architecture (Hong et al., 2020) for modeling the operation policy  $\hat{\pi}$ . The model has two components: an encoder and a decoder; both are implemented as Transformer models (with self-attention). The encoder takes as input a description  $d_t^s$  or  $d_t^g$  and generates a sequence of hidden vectors. In every step, the decoder takes as input the previous hidden vector  $b_{t-1}^s$ , the sequence of vectors representing  $d_t^s$ , and the sequence of vectors representing  $d_t^g$ . It then performs self-attention on these vectors and computes the current hidden vector  $b_t^s$  and a probability distribution over navigation actions  $p_t$ .

The representation of each object is computed as follows. Let  $f^{\text{name}}$ ,  $f^{\text{horz}}$ ,  $f^{\text{vert}}$ ,  $f^{\text{dist}}$ , and  $f^{\text{type}}$  are the name, horizontal angle, vertical angle, distance, and type of a room or object  $f$  (a type is either “room” or “object”). For simplicity, we discretize the feature values into 12 horizontal angles, 3 vertical angles, and 5 distances (by rounding down a real-valued distance to the nearest integer). For a room,  $f^{\text{horz}}$ ,  $f^{\text{vert}}$ ,  $f^{\text{dist}}$  are zeroes. We lookup the embedding of each feature from an embedding table and sum all the embeddings into a single vector that represents the corresponding room or object.

During pre-training, we randomly drop room or object features in  $d_t^s$  or  $d_t^g$  so that the navigation policy is familiar with making decision under incomplete information. Concretely, we define a *feature set* as all features of an object or the room name feature. For  $d_t^s$ , let  $M$  be the number objects in a description. We keep  $m$  feature sets where  $m \sim \text{Uniform}(\min(5, M), M)$ . For  $d_t^s$ , we have two cases. If  $g_1$  is not within one node from  $s_1$ , we uniformly randomly alternate between giving dense and sparse descriptions. Otherwise, when  $g_1$  is adjacent or equals to  $s_1$ , with a probability of  $1/3$ , we either give (a) a dense description (b) a (sparse) description that contains the goal room’s name and the target object’s features, or (c) a (sparse) description that describes the next ground-truth action.

The interaction policy  $\psi_\theta$  is an LSTM-based recurrent neural network. The input of this model is navigation policy outputs,  $b_t^s$  and  $p_t$ , and the embedding of the previously taken action. The critic

Table 3: Dataset.

| Split                   | Number of examples |
|-------------------------|--------------------|
| Pre-training            | 82,104             |
| Pre-training validation | 3,000              |
| Training                | 65,133             |
| Validation UNSEENSTR    | 1,901              |
| Validation UNSEENOBJ    | 1,912              |
| Validation UNSEENENV    | 1,967              |
| Test UNSEENSTR          | 1,653              |
| Test UNSEENOBJ          | 1,913              |
| Test UNSEENENV          | 1,777              |

Table 4: Hyperparameters.

| Hyperparameter                                          | Value           |
|---------------------------------------------------------|-----------------|
| <b>Environment</b>                                      |                 |
| Max. subgoal distance                                   | 3 nodes         |
| Max. stack size                                         | 2               |
| Max. object distance for $d_t^s$                        | 5 meters        |
| Max. object distance for $d_t^g$                        | 3 meters        |
| Max. number of objects (for dense $d_t^s$ and $d_t^g$ ) | 20              |
| Cost of taking each CUR, GOAL, SUB, action              | 0.01            |
| <b>Operation policy <math>\hat{\pi}</math></b>          |                 |
| Hidden size                                             | 256             |
| Number of hidden layers                                 | 2               |
| Attention dropout probability                           | 0.1             |
| Hidden dropout probability                              | 0.1             |
| Number of attention heads                               | 8               |
| Optimizer                                               | Adam            |
| Learning rate                                           | $10^{-4}$       |
| Batch size                                              | 32              |
| Number of training iterations                           | $10^5$          |
| Maximum number of time steps                            | 15              |
| <b>Interaction policy <math>\psi_\theta</math></b>      |                 |
| Hidden size                                             | 512             |
| Number of hidden layers                                 | 1               |
| Entropy regularization weight                           | 0.001           |
| Optimizer                                               | Adam            |
| Learning rate                                           | $10^{-5}$       |
| Batch size                                              | 32              |
| Number of training iterations                           | $5 \times 10^4$ |
| Maximum number of time steps                            | 30              |

model also has a similar architecture but outputs a real number (the  $V$  value) rather than an action distribution. When training the interaction policy, we always fix the parameters of the navigation policy. We find it necessary to pre-train the critic policy before training it jointly with the actor policy.

**Data.** See Table 3 for a summary of the data splits. From a total of 72 environments provided the Matterport3D dataset, we use 36 environments for pre-training, 18 as unseen during training, 11 for validation UNSEENENV, and 7 for test UNSEENENV. We use a vocabulary of size 1738, which include object and room names, and special tokens for distances and directions. Each navigation path in our dataset has from 5 to 10 nodes.

**Hyperparameters.** See Table 4.
